# Supplementary material for: The first pterosaur pelvic material from the Dinosaur Park Formation (Campanian) and implications for azhdarchid locomotion
Source: Atypon-hosted journal article supplement (doi:10.1139/facets-2016-0067), 2017-01-01

## Supplemental Information

The first pterosaur pelvic material from the Dinosaur Park Formation (Campanian) and implications for azhdarchid locomotion

Gregory F. Funston<sup>1\*</sup>, Elizabeth Martin-Silverstone<sup>2</sup>, Philip J. Currie<sup>1</sup>

\*Corresponding author

<sup>1</sup>Department of Biological Sciences, CW 405, Biological Sciences Building, University of Alberta, Edmonton, Alberta, Canada T6G 2E9

[funston@ualberta.ca](mailto:funston@ualberta.ca), [pjcurrie@ualberta.ca](mailto:pjcurrie@ualberta.ca)

<sup>2</sup> Ocean and Earth Science, University of Southampton, National Oceanography Centre, Southampton, University of Southampton, Southampton SO14 3ZH, UK

[egmartin19@gmail.com](mailto:egmartin19@gmail.com)

Supplemental Video 1:  
UALVP 56200, Azhdarchidae indet. CT reconstruction of specimen (cyan) rendered transparent to reveal low-density internal areas (yellow), spinning counterclockwise.

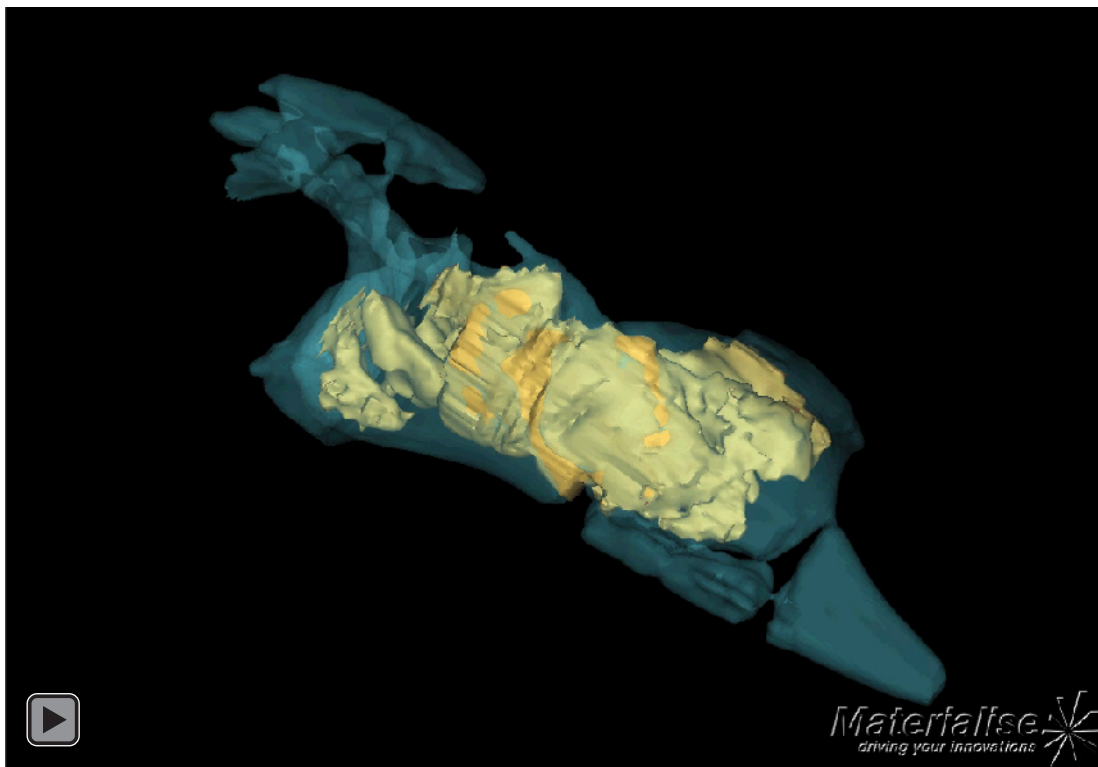

Supplemental Video 2:

UALVP 56200, Azhdarchidae indet. CT reconstruction of specimen (cyan) rendered transparent to reveal hollow cavities: anterior pneumatic cavity (red); ventral pneumatic cavity (dark blue); outpocket of dorsal pneumatic cavity (yellow); posterior pneumatic cavity (magenta); and a vascular canal (purple). Model is spinning counterclockwise.

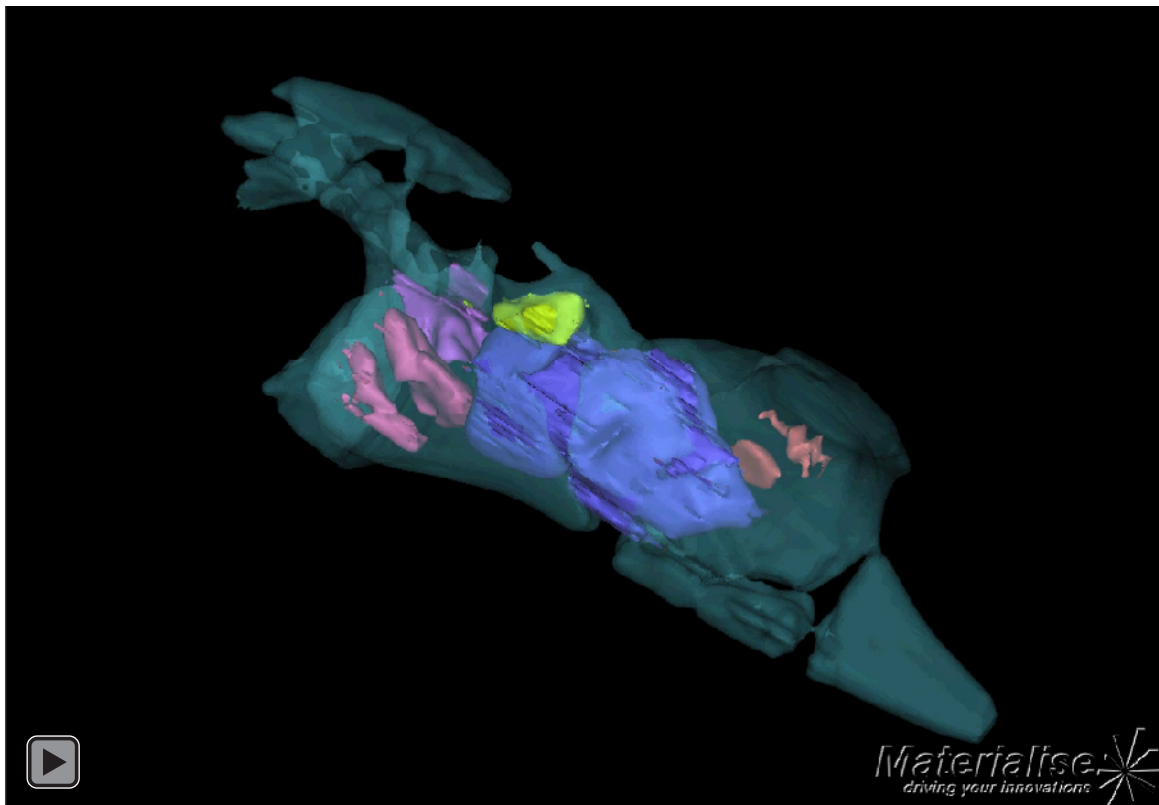

Supplement: facets-2016-0067_supplement2.pdf [file facets-2016-0067_supplement2.pdf]
