# Supplementary figures and images for: The first pterosaur pelvic material from the Dinosaur Park Formation (Campanian) and implications for azhdarchid locomotion
Source: Atypon-hosted journal article supplement (doi:10.1139/facets-2016-0067), 2017-01-01

# Geomagic® Design™ X

3D PDF

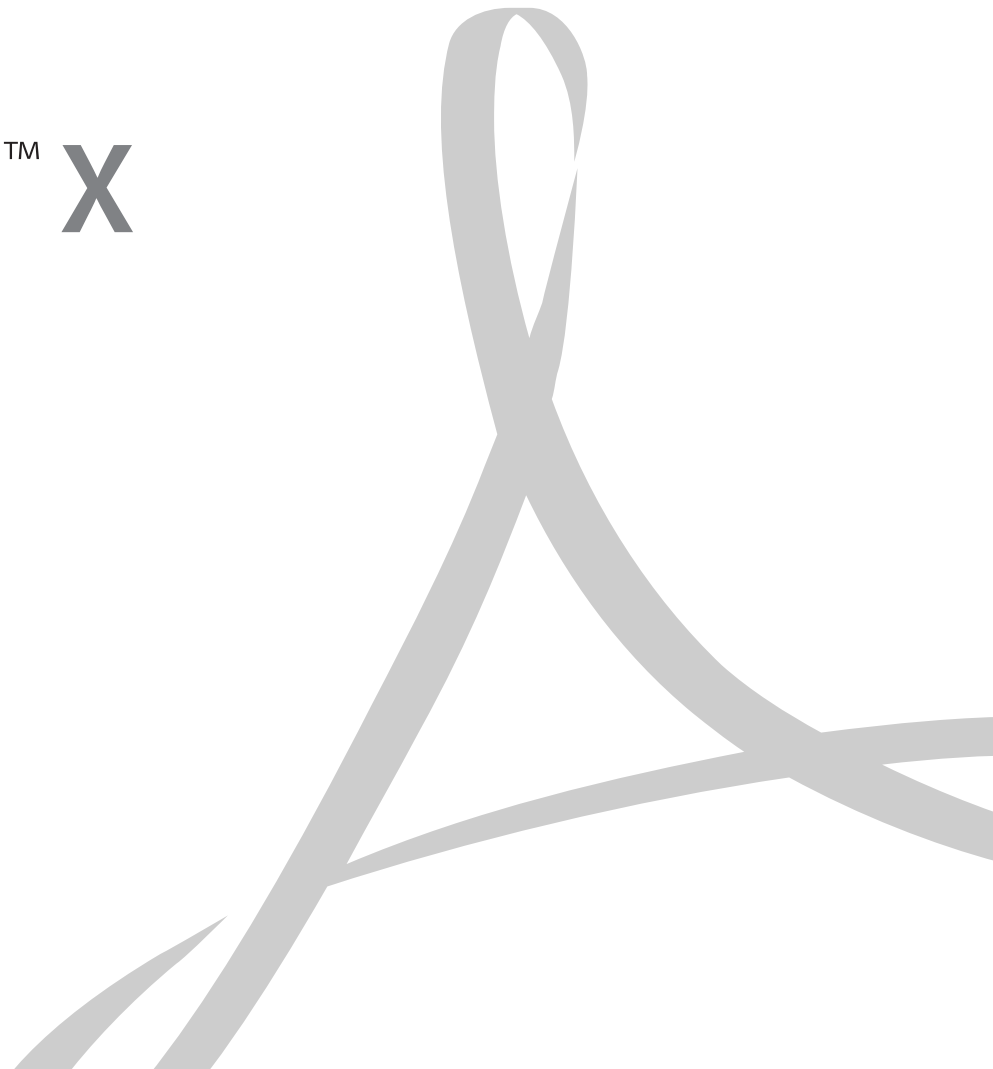

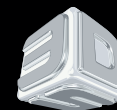

3DSYSTEMS®

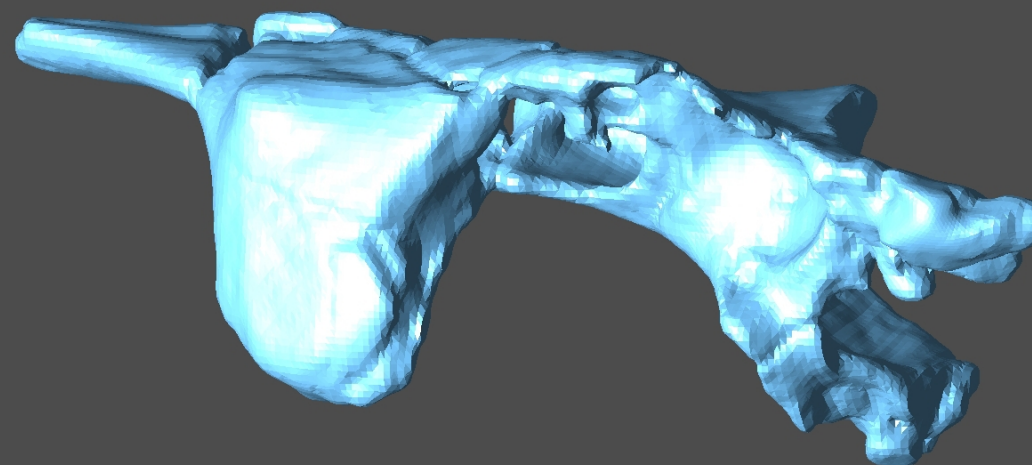

Supplement: facets-2016-0067_supplement1.pdf [file facets-2016-0067_supplement1.pdf]
